# Supplementary material for: Facile in situ synthesis of visible-light plasmonic photocatalysts M@TiO2 (M = Au, Pt, Ag) and evaluation of their photocatalytic oxidation of benzene to phenol
Source: Royal Society of Chemistry journal article supplement (doi:10.1039/c1jm10983a), 2011-01-01
Supplement: c1jm10983a.pdf [file c1jm10983a.pdf]

Electronic Supplementary Information (ESI) for Journal of Materials Chemistry

This journal is © Royal Society of Chemistry 2011

**Facile *in Situ* Synthesis of Visible-Light Plasmonic Photocatalysts  
M@TiO<sub>2</sub> (M = Au, Pt, Ag) and Evaluation of Their Photocatalytic  
Oxidation of Benzene to Phenol**

**Zhaoke Zheng,<sup>a</sup> Baibiao Huang,<sup>\*a</sup> Xiaoyan Qin,<sup>a</sup> Xiaoyang Zhang,<sup>a</sup> Ying Dai,<sup>b</sup>  
and Myung-Hwan Whangbo<sup>c</sup>**

<sup>a</sup>State Key Lab of Crystal Materials, Shandong University, Jinan, 250100, China. E-mail:  
bbhuang@sdu.edu.cn

<sup>b</sup>School of Physics, Shandong University, Jinan, 250100, China

<sup>c</sup>North Carolina State University, Raleigh, North Carolina, 27695-8204, USA

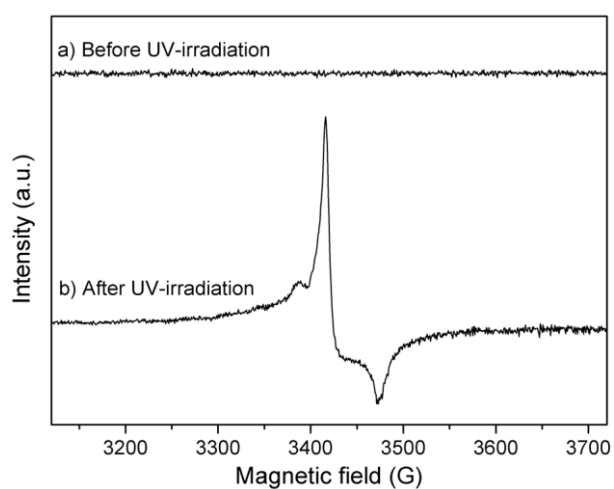

**Fig. S1** The EPR spectrum of naked  $\text{TiO}_2$ -microspheres before and after UV-irradiation.

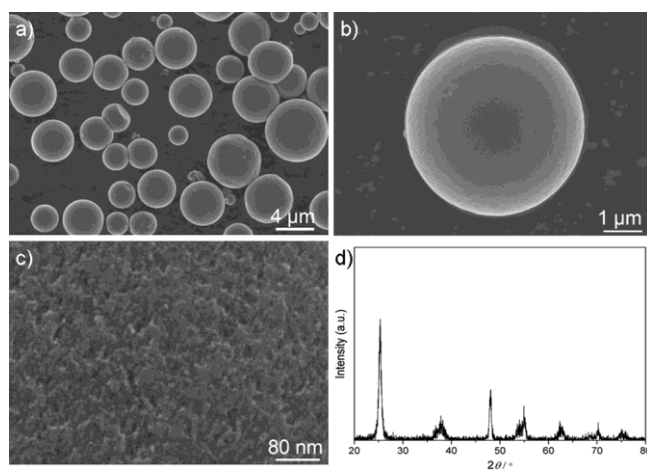

**Fig. S2** a–c) SEM images and d) XRD pattern of the naked  $\text{TiO}_2$ -microspheres.

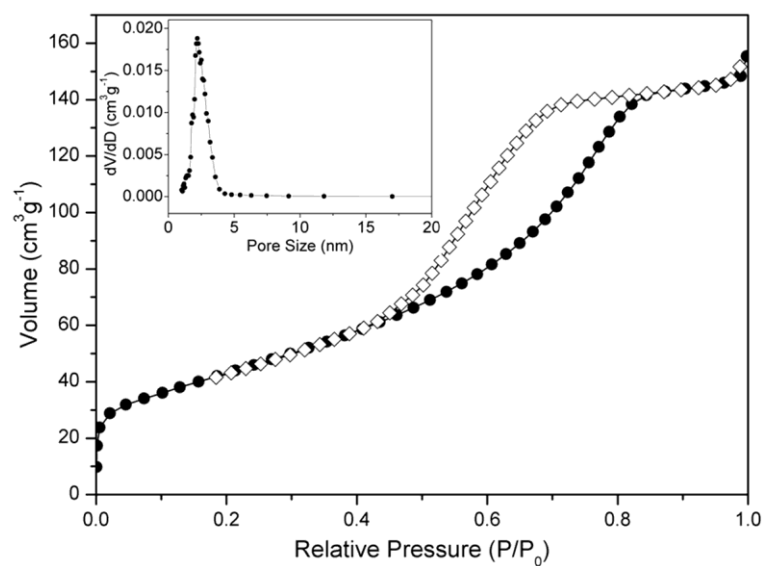

**Fig. S3** Nitrogen adsorption (●) –desorption (□) isotherm and corresponding pore size distributions (inset) of the naked TiO<sub>2</sub>-microspheres.

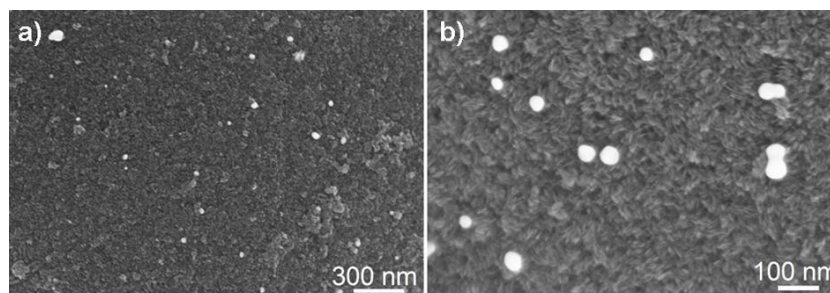

**Fig. S4** SEM images of Au@TiO<sub>2</sub>-microspheres prepared by the traditional photo-deposition route with loading amount of 1 wt%.

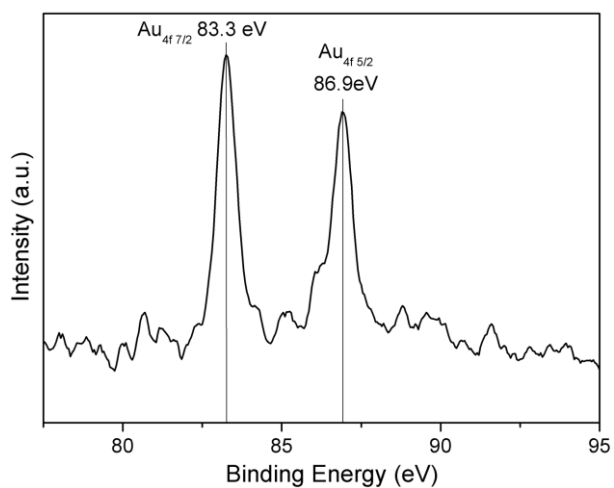

**Fig. S5** XPS spectra of Au 4f of Au@TiO<sub>2</sub>-microspheres.

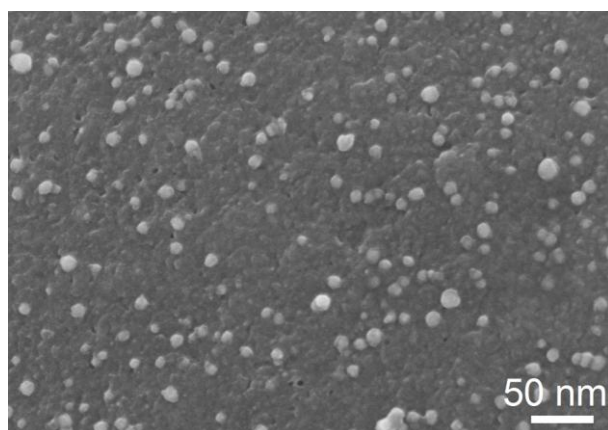

**Fig. S6** High-magnification SEM image of Au@TiO<sub>2</sub>-microspheres with loading amount of 1 wt %.

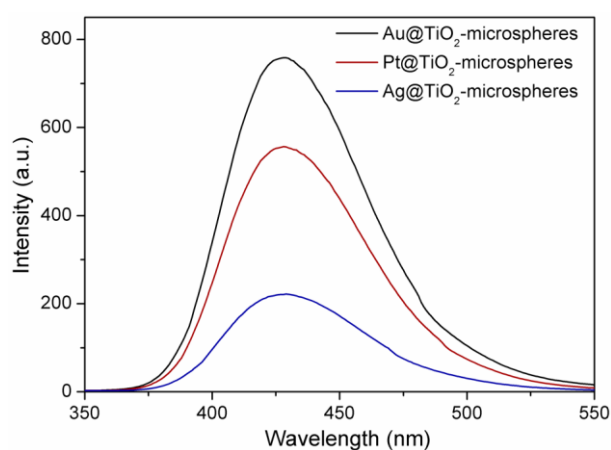

**Fig. S7** Fluorescence spectra of the samples irradiated by the visible light ( $\lambda \geq 400$  nm) in 3 mM terephthalic acid under irradiation for 180 min.

**Table S1** UV-light-induced catalytic oxidation of benzene in the absence (left column) and present (right column) of phenol.<sup>a</sup>

| Photocatalyst                             | Residual reactant (%) |                |
|-------------------------------------------|-----------------------|----------------|
|                                           | benzene               | benzene/phenol |
| TiO <sub>2</sub> -microspheres            | 34                    | 37/29          |
| Au@TiO <sub>2</sub> -microspheres (1 wt%) | 25                    | 26/20          |

<sup>a</sup> The amounts of the initially added benzene and phenol are both 1200 ppm. The reaction time is 5 h.
